# Supplementary material for: Can global precipitation datasets benefit the estimation of the area to be cropped in irrigated agriculture?
Source: Copernicus journal article supplement (doi:10.5194/hess-2018-331), 2018-06-29
Supplement: Supplementary file 1 [file hess-2018-331-supplement.pdf]

## Supplementary material

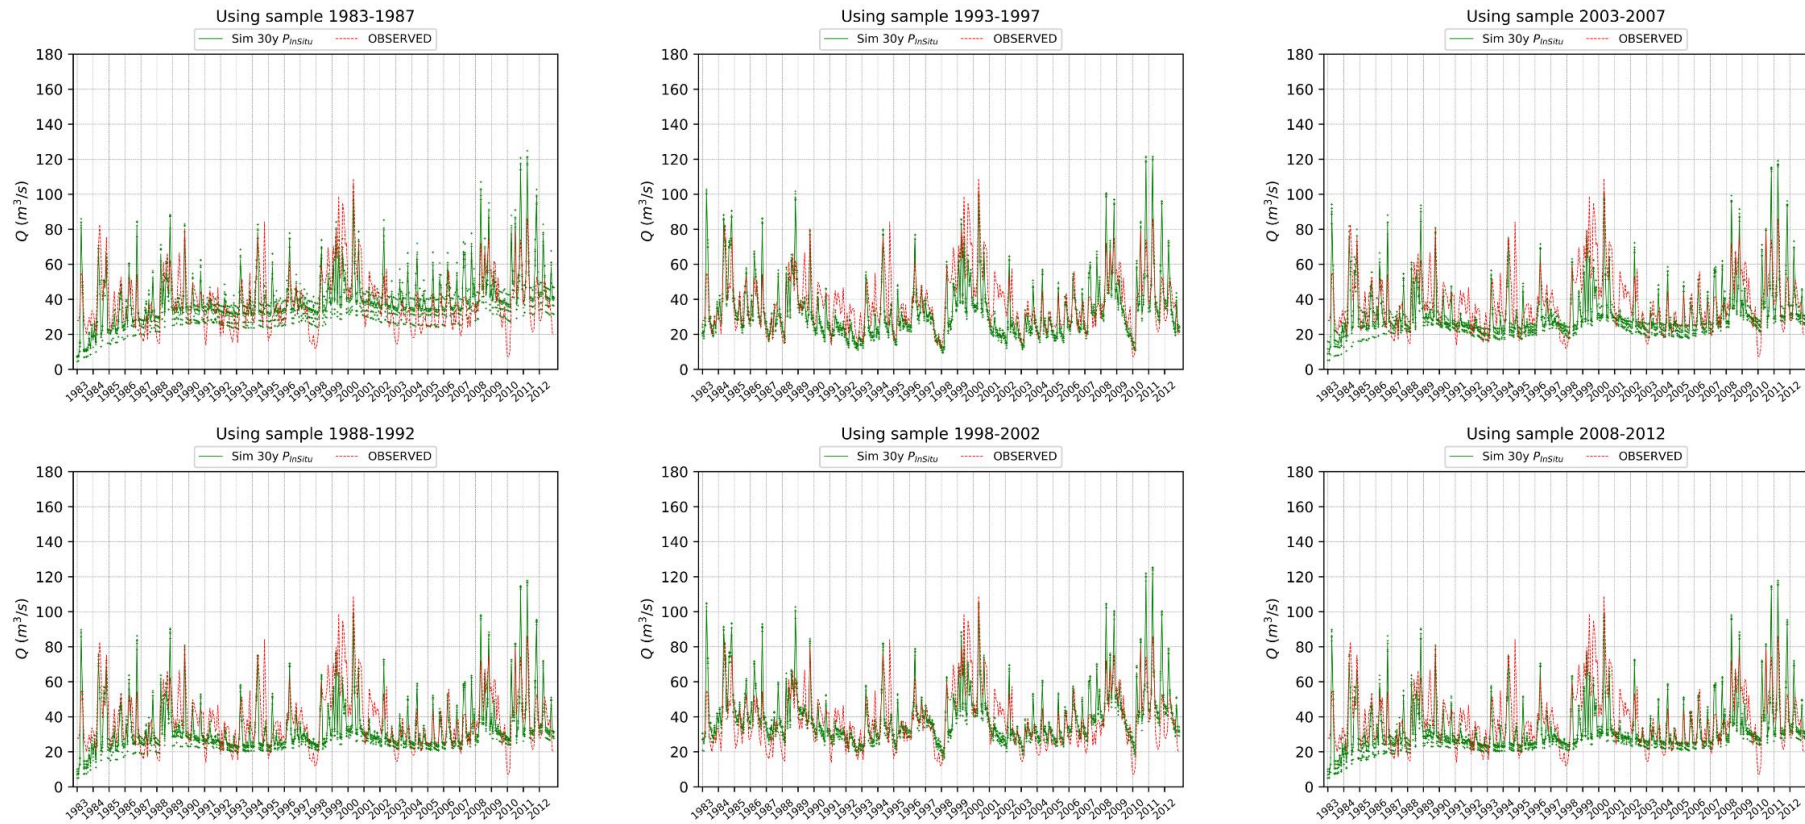

Figure S1. Observed and simulated Coello River discharge with 30 years (1983-2012) of In-Situ precipitation (Sim 30y  $P_{in-situ}$ ) for all calibration samples (1983-1987, 1988-1992, 1993-1997, 1998-2002, 2003-2007, 2008-2012).

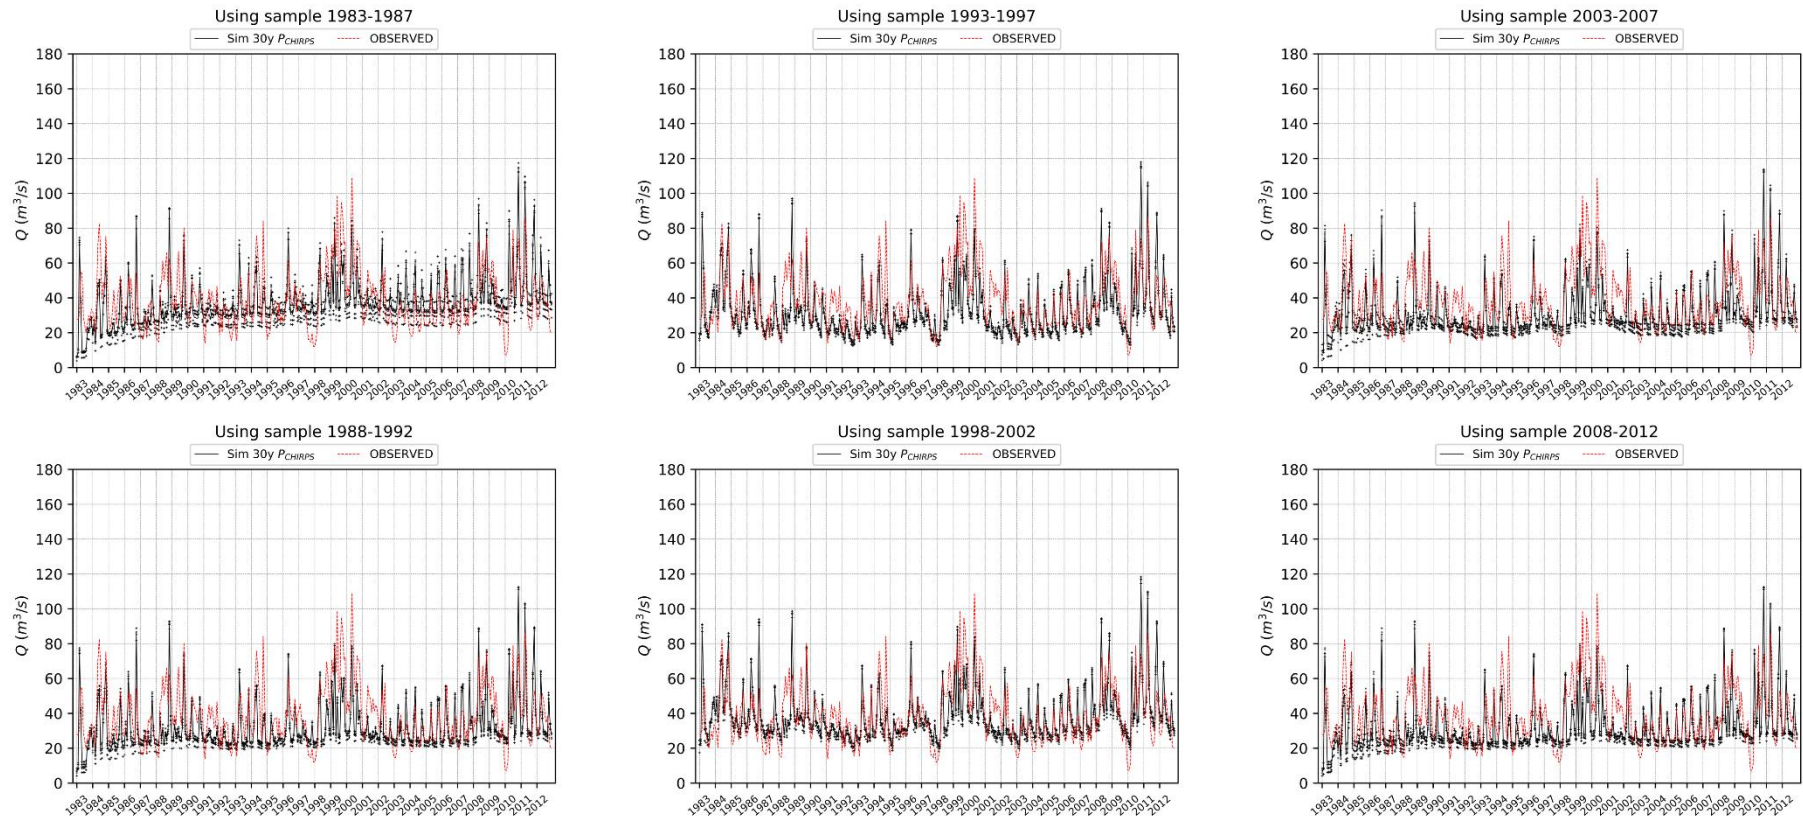

**Figure S2. Observed and simulated Coello River discharge with 30 years (1983-2012) of CHIRPS precipitation (Sim 30y  $P_{CHIRPS}$ ) for all calibration samples (1983-1987, 1988-1992, 1993-1997, 1998-2002, 2003-2007, 2008-2012).**

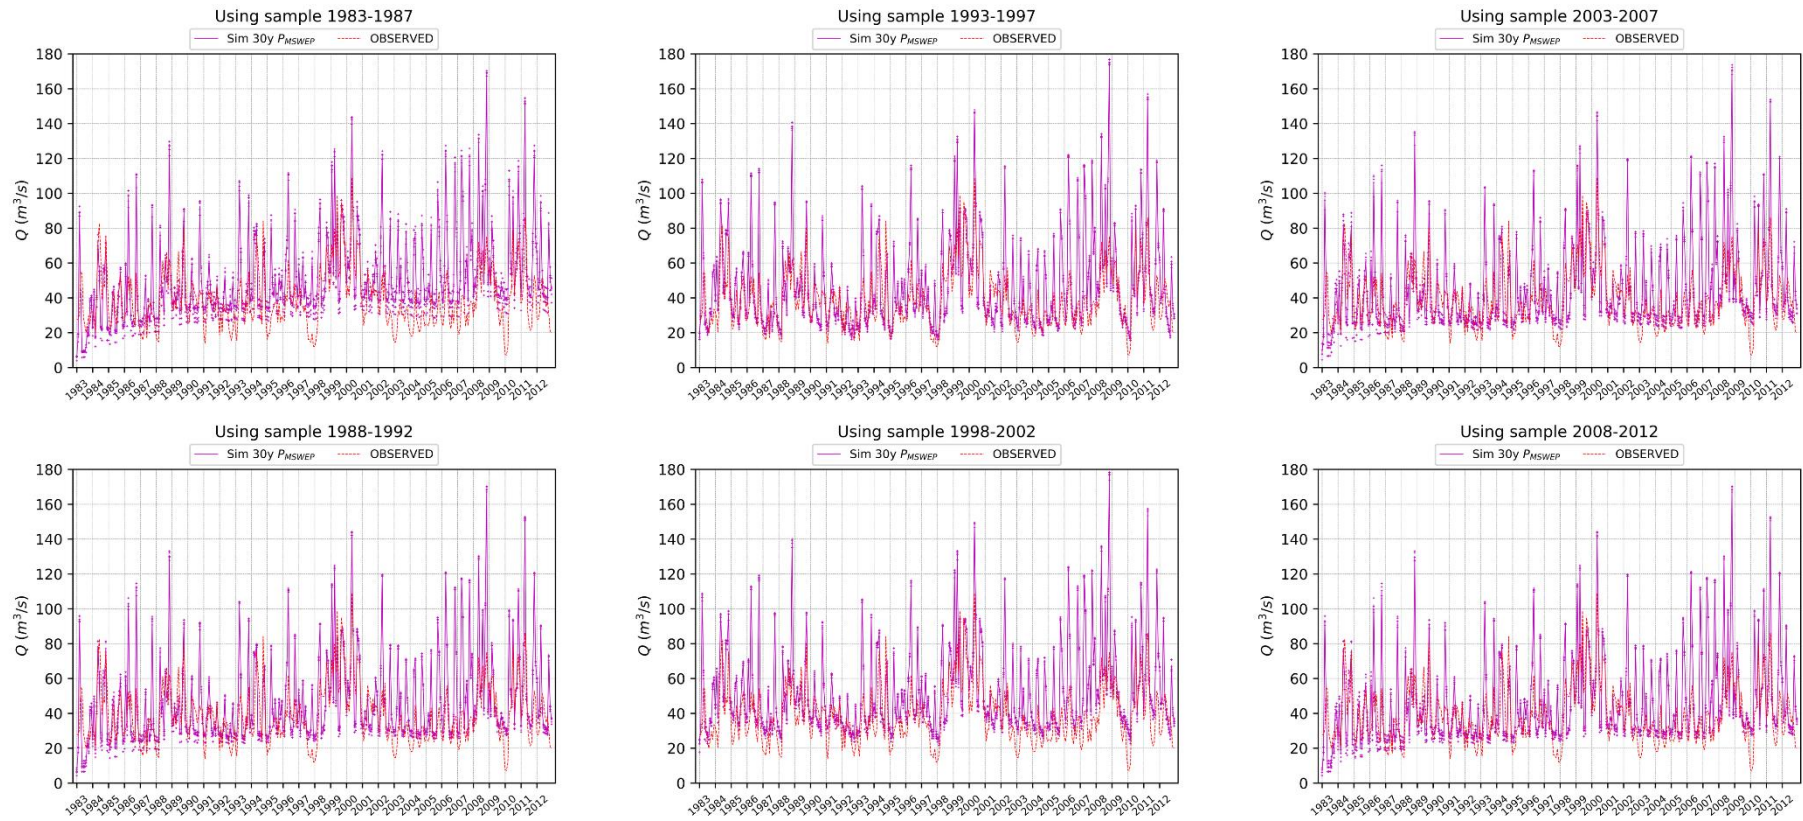

**Figure S3. Observed and simulated Coello River discharge with 30 years (1983-2012) of MSWEP precipitation (Sim 30y  $P_{MSWEP}$ ) for all calibration samples (1983-1987, 1988-1992, 1993-1997, 1998-2002, 2003-2007, 2008-2012).**

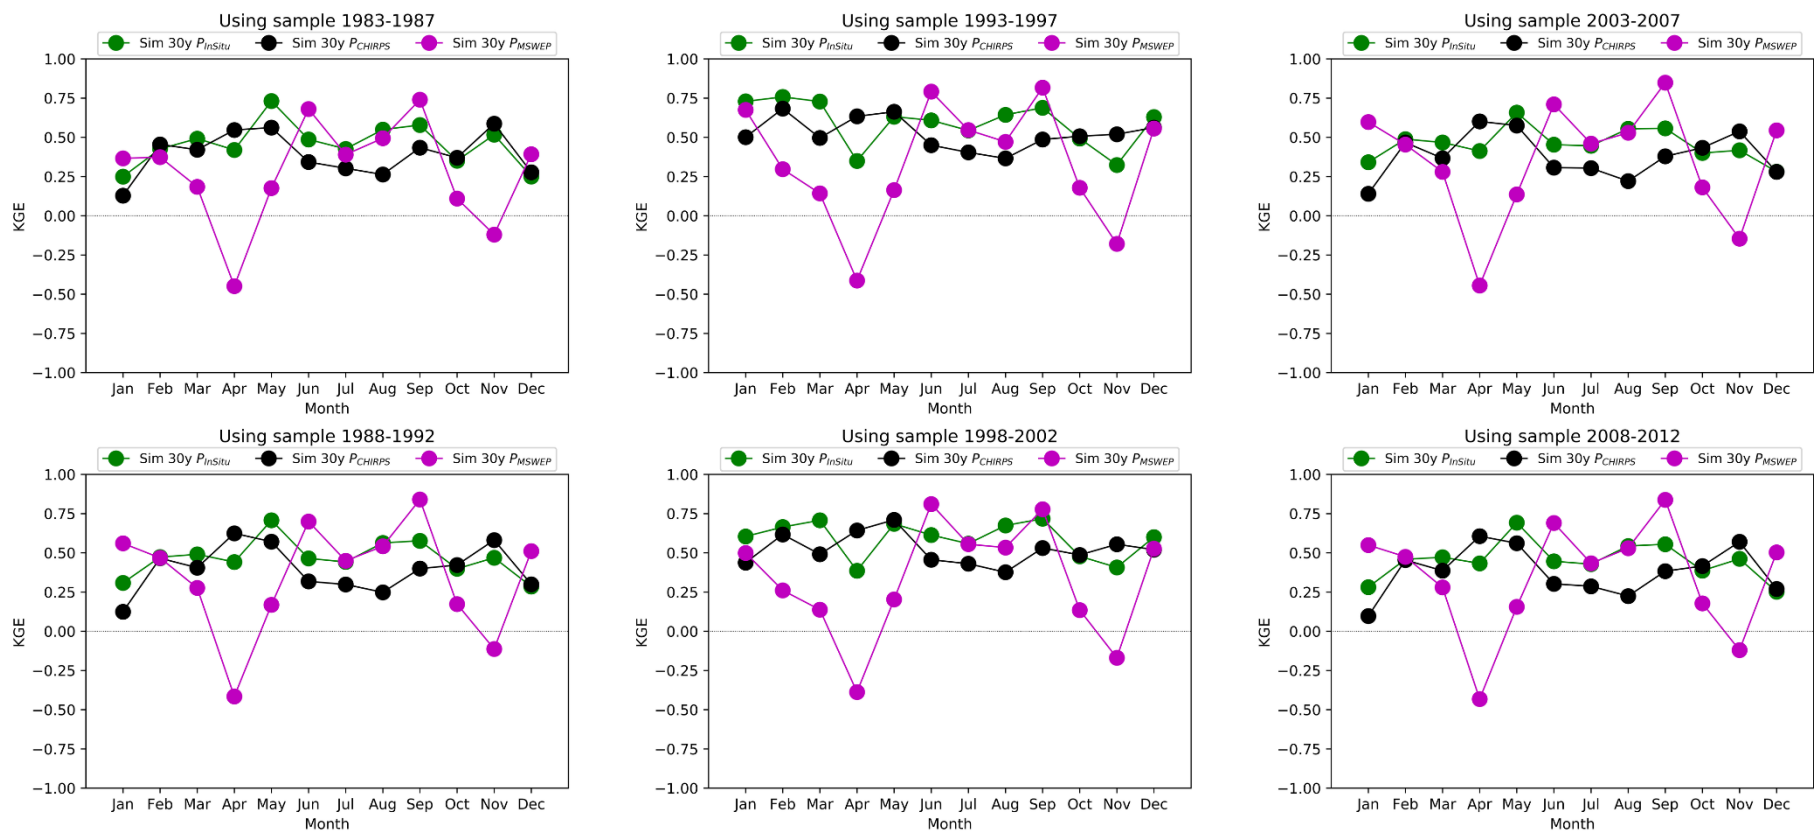

**Figure S4.** KGE performance metric for simulated river discharge for the complete time period of 30 years (1983-2012) using three different precipitation datasets (In-Situ, CHIRPS and MSWEP) in the Coello basin. Six independent samples of observed river discharge of 5 years (1983-1987, 1988-1992, 1993-1997, 1998-2002, 2003-2007 and 2008-2012) are used to calibrate model parameters, with the sample used for model calibration indicated in the header.

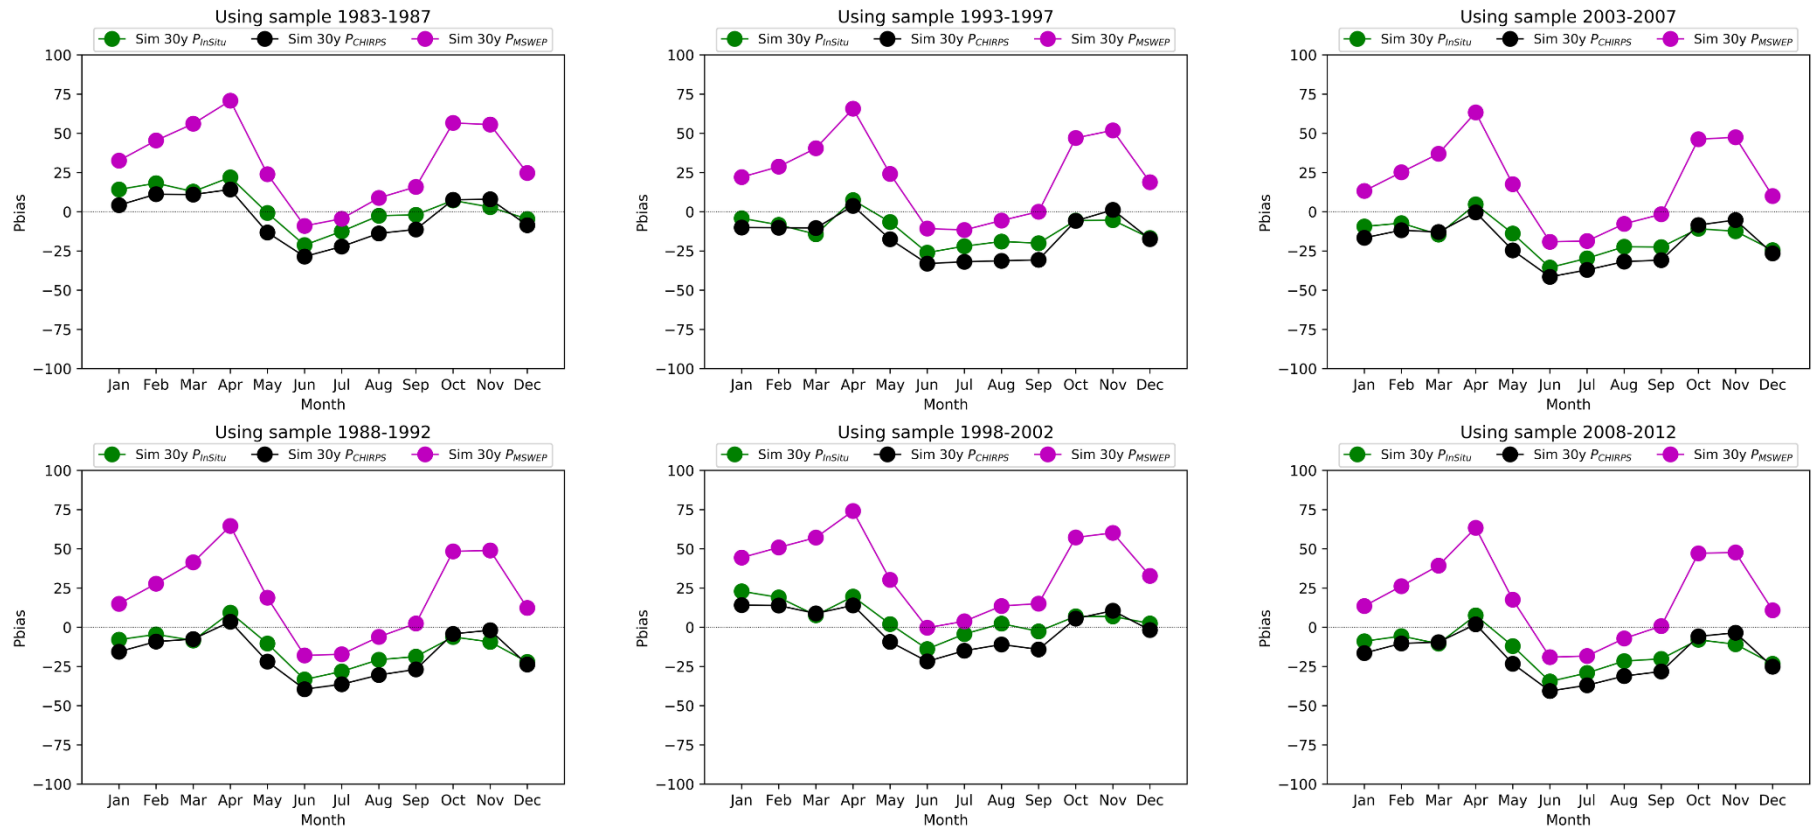

**Figure S5.** Pbias performance metric for simulated river discharge for the complete time period of 30 years (1983-2012) using three different precipitation datasets (In-Situ, CHIRPS and MSWEP) in the Coello basin. Six independent samples of observed river discharge of 5 years (1983-1987, 1988-1992, 1993-1997, 1998-2002, 2003-2007 and 2008-2012) are used to calibrate model parameters, with the sample used for model calibration indicated in the header.

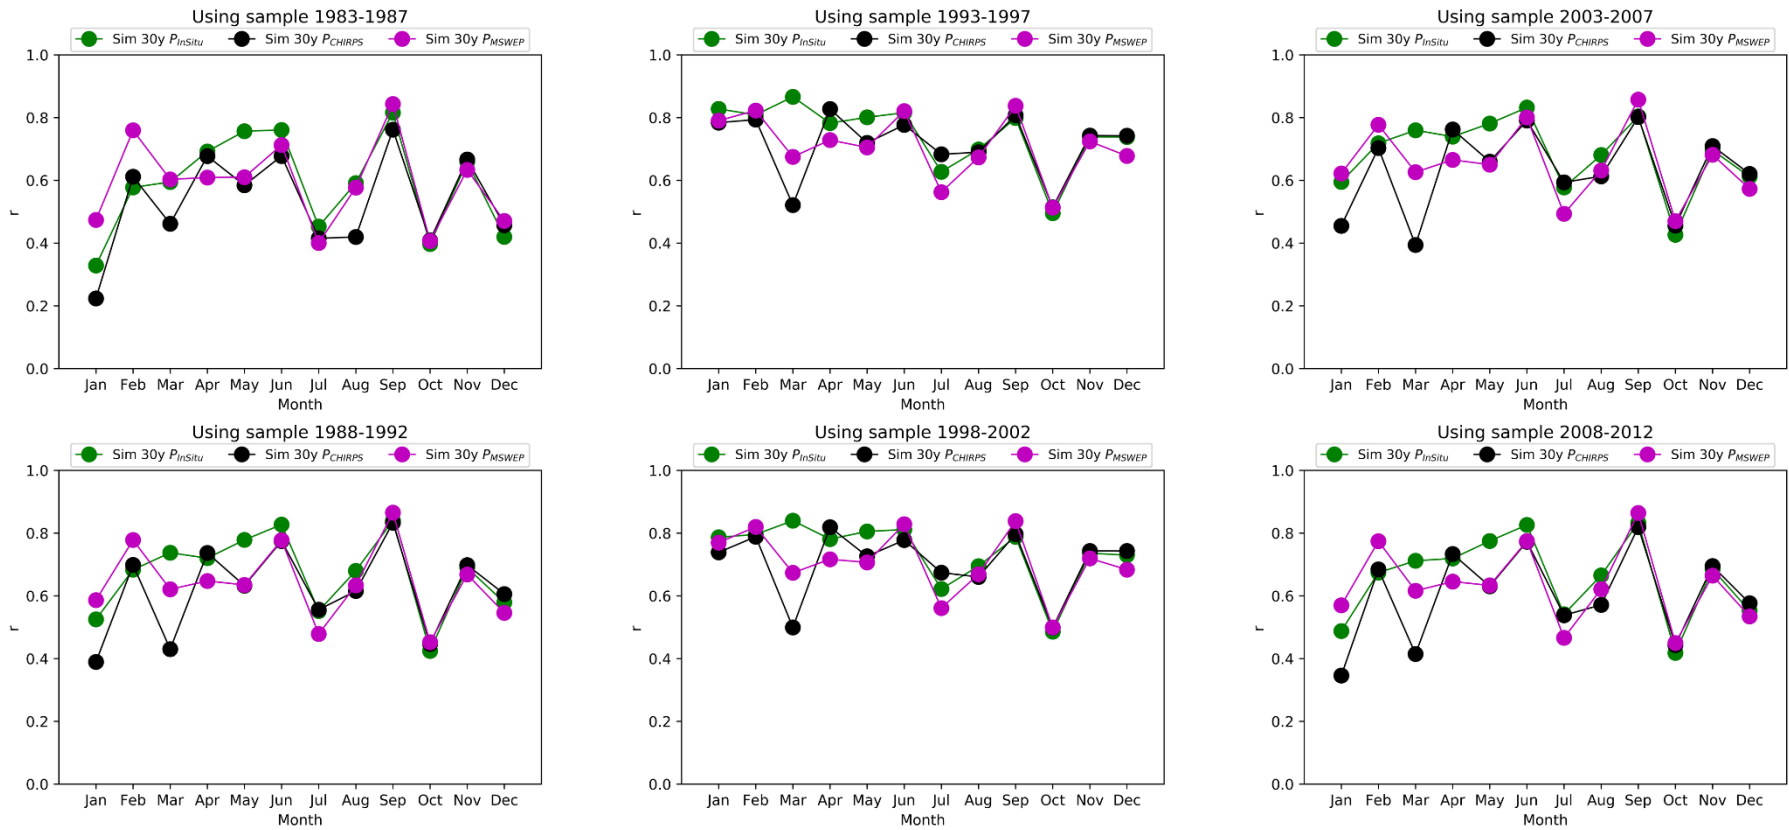

**Figure S6. Pearson correlation,  $r$  performance metric for simulated river discharge for the complete time period of 30 years (1983-2012) using three different precipitation datasets (In-Situ, CHIRPS and MSWEP) in the Coello basin. Six independent samples of observed river discharge of 5 years (1983-1987, 1988-1992, 1993-1997, 1998-2002, 2003-2007 and 2008-2012) are used to calibrate model parameters, with the sample used for model calibration indicated in the header.**

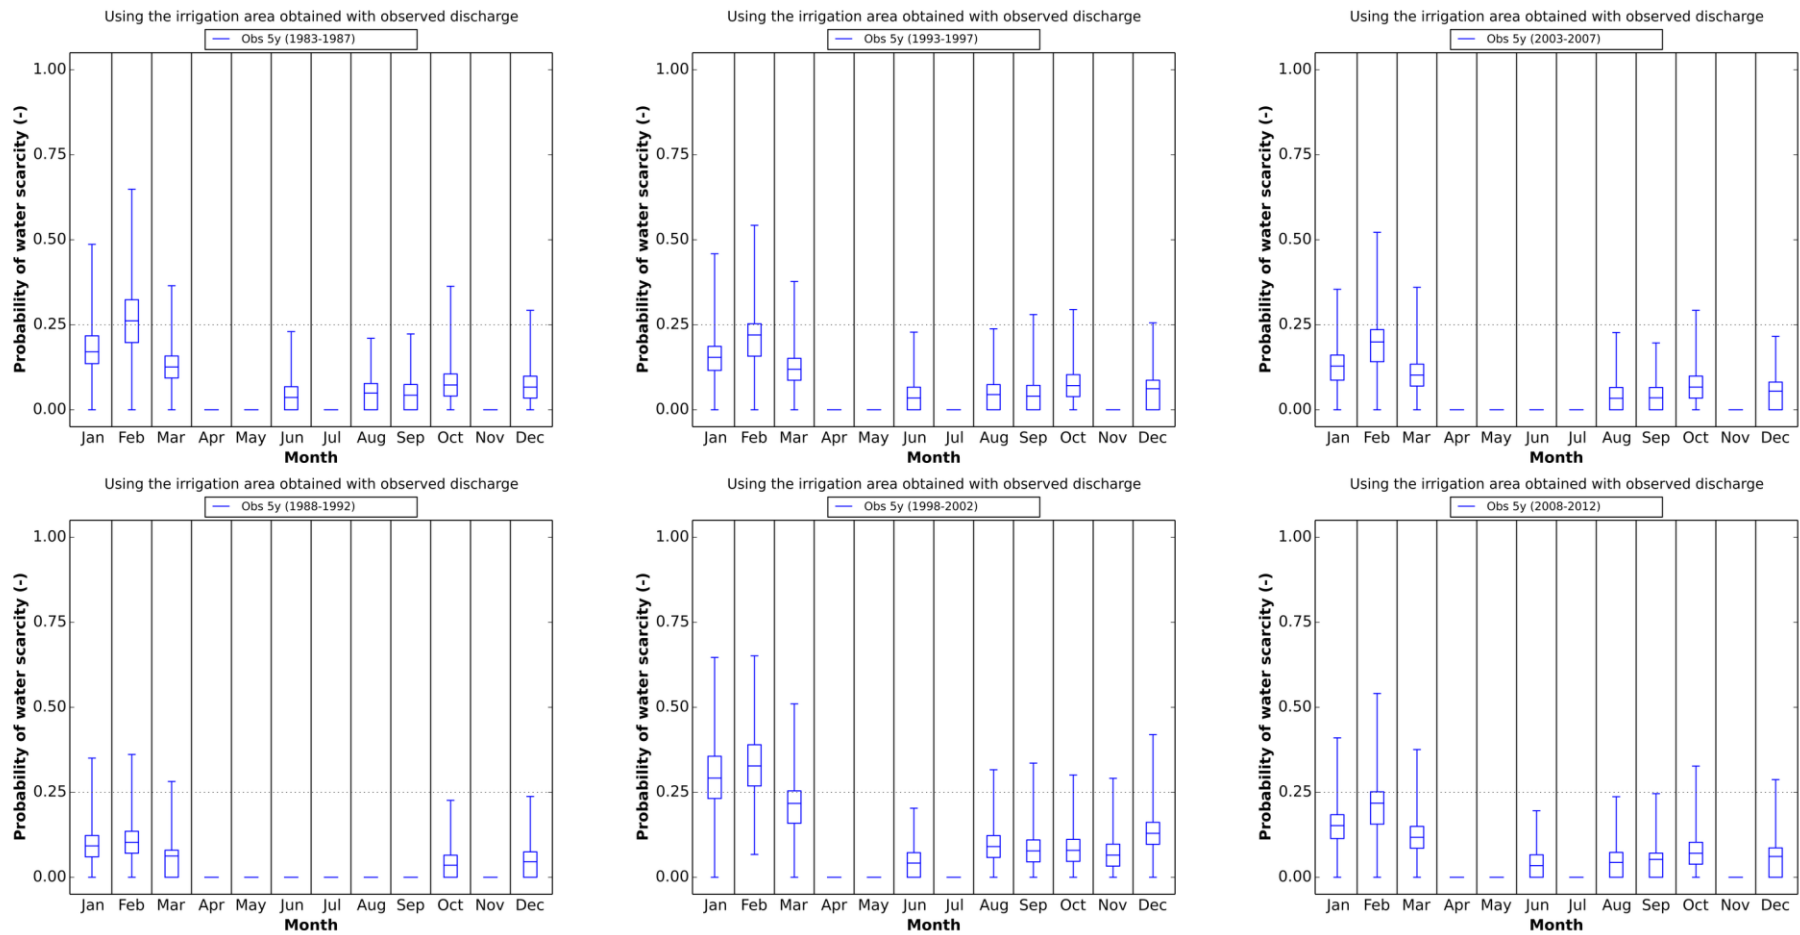

**Figure S7. Probability of water scarcity using the irrigation area obtained with the observed river discharge of 5 years (Obs 5y) and the reference surface water availability. Boxplots show the median, interquartile range and minimum-maximum range.**

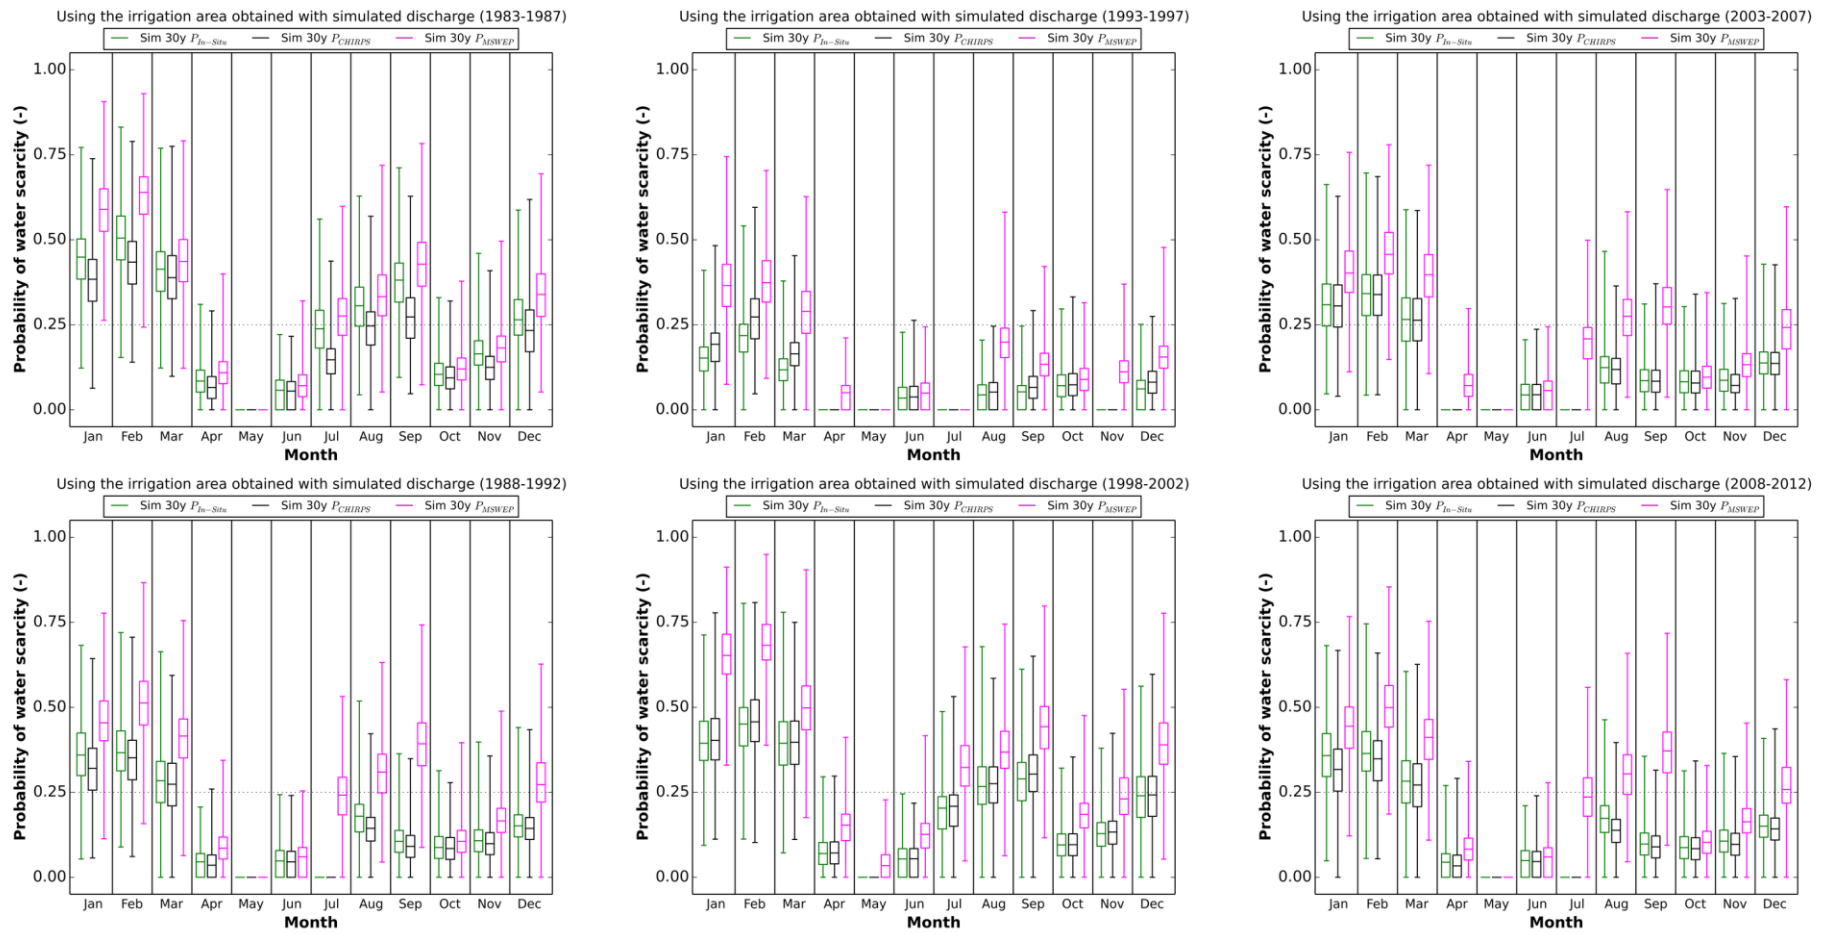

**Figure S8. Probability of water scarcity using the irrigation area obtained with simulated river discharge information (Sim 30y  $P_{In-Situ}$ , Sim 30y  $P_{CHIRPS}$ , Sim 30y  $P_{MSWEP}$ ) and the reference surface water availability. Boxplots show the median, interquartile range and minimum-maximum range.**



Using the irrigation area obtained with simulated discharge (1983-1987)

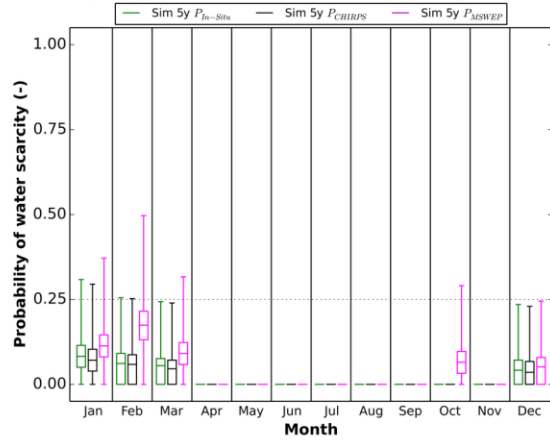

Using the irrigation area obtained with simulated discharge (1993-1997)

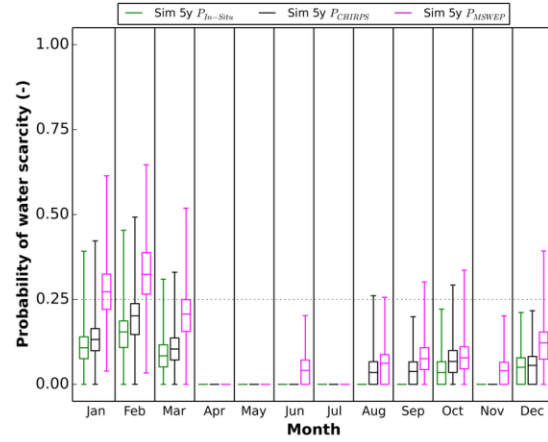

Using the irrigation area obtained with simulated discharge (2003-2007)

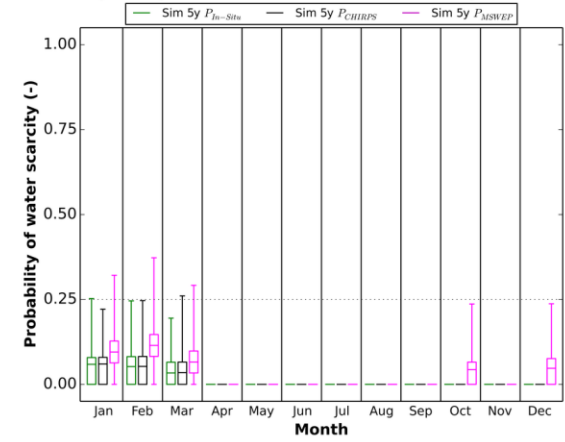

Using the irrigation area obtained with simulated discharge (1988-1992)

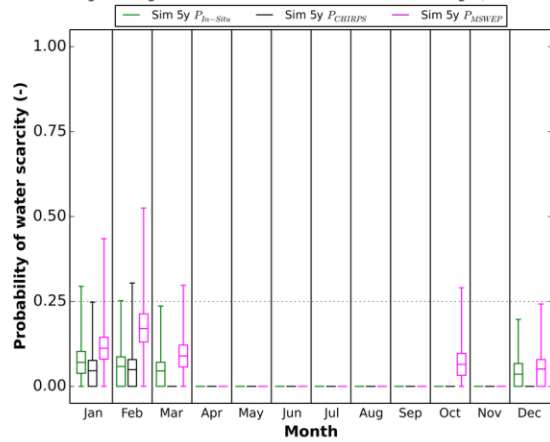

Using the irrigation area obtained with simulated discharge (1998-2002)

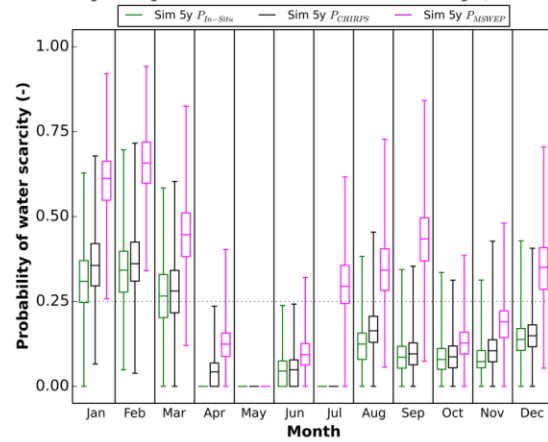

Using the irrigation area obtained with simulated discharge (2008-2012)

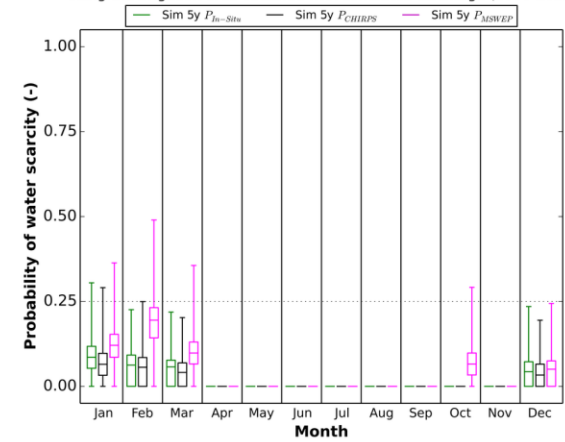

**Figure S9. Probability of water scarcity using the irrigation area obtained with simulated river discharge information (Sim 5y  $P_{In-situ}$ , Sim 5y  $P_{CHIRPS}$ , Sim 5y  $P_{MSWEF}$ ) and the reference surface water availability. Boxplots show the median, interquartile range and minimum-maximum range.**

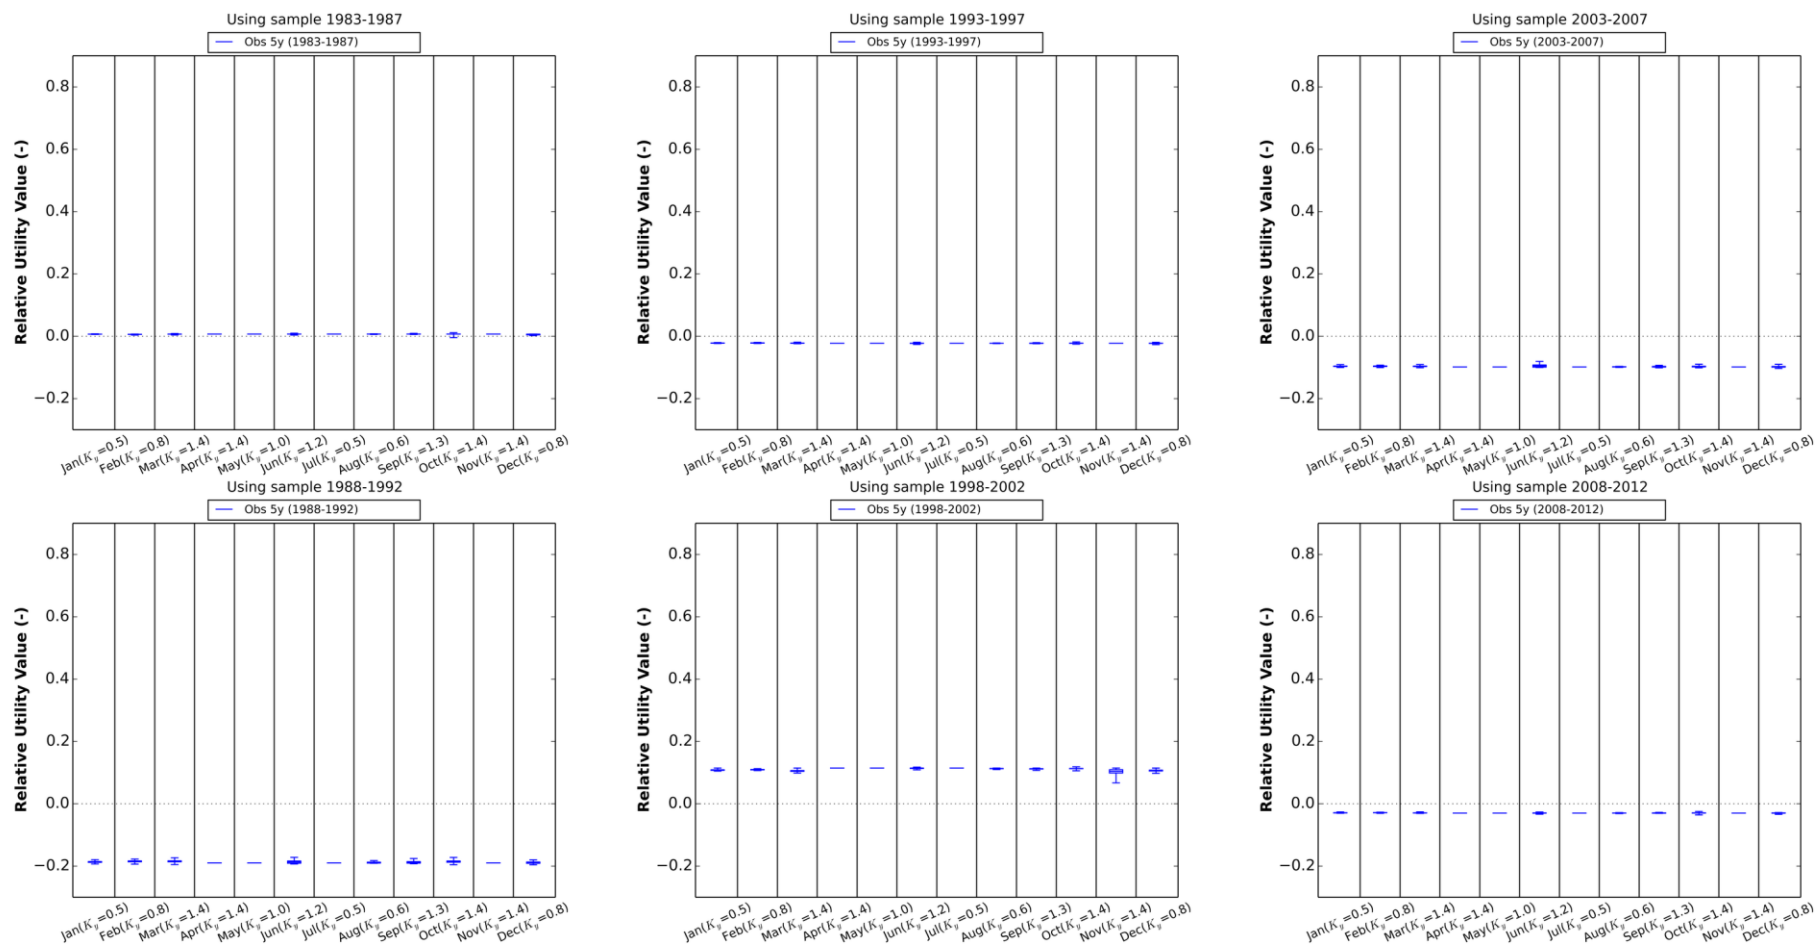

**Figure S10. Relative Utility Value using observed river discharge of 5 years for water scarcity happening independently in one month.  $K_y$  is the sensitivity of the crop to water deficit. Boxplots show the median, interquartile range and minimum-maximum range.**

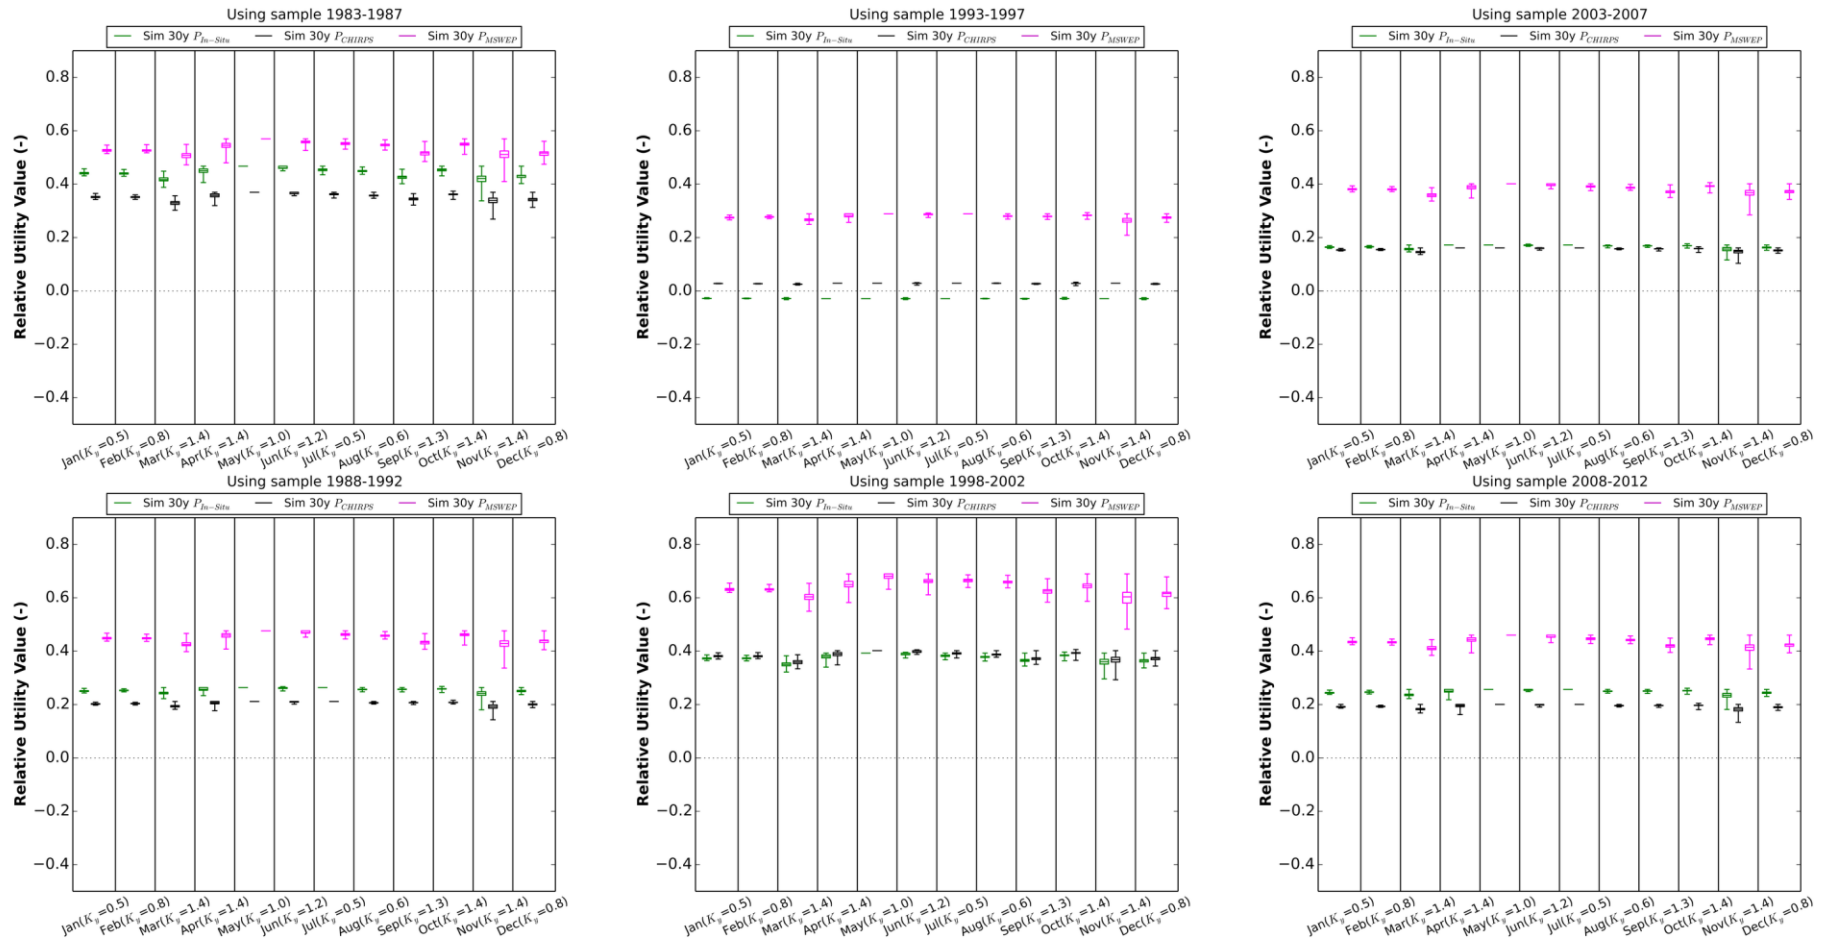

**Figure S11. Relative Utility Value using simulated river discharge of 30 years for water scarcity happening independently in one month.  $K_y$  is the sensitivity of the crop to water deficit. Boxplots show the median, interquartile range and minimum-maximum range.**

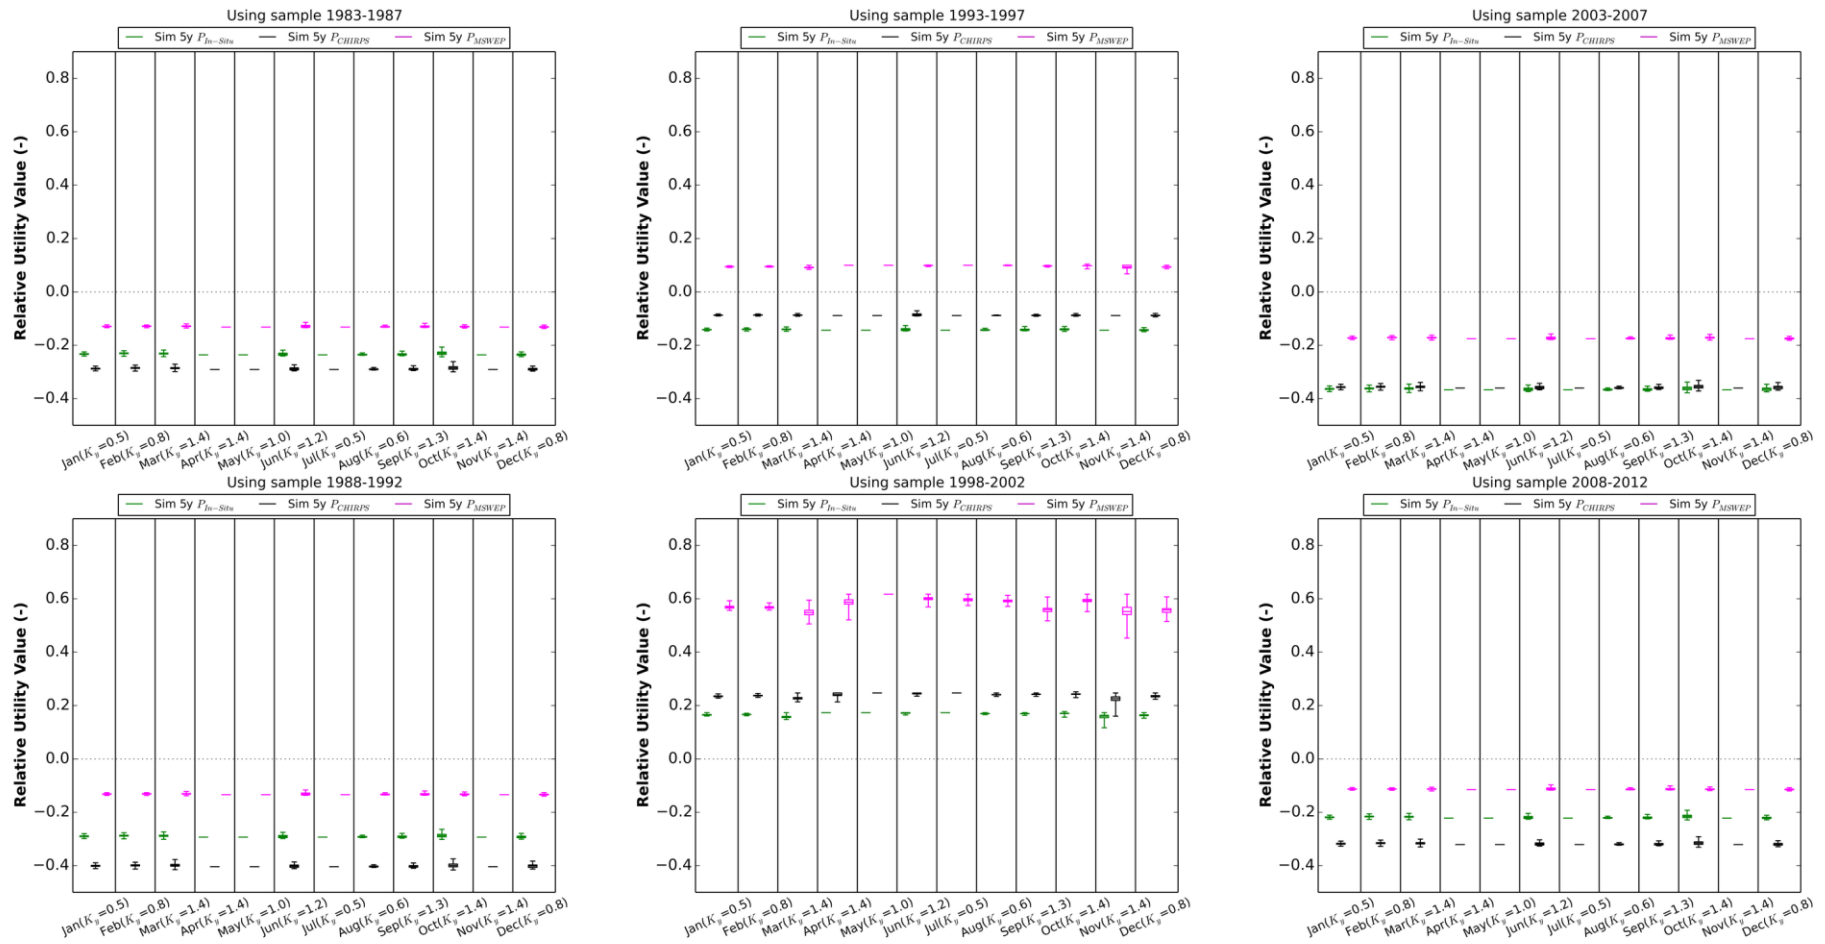

**Figure S12. Relative Utility Value using simulated river discharge of 5 years for water scarcity happening independently in one month.  $K_y$  is the sensitivity of the crop to water deficit. Boxplots show the median, interquartile range and minimum-maximum range.**
